# Supplementary material for: Coordinated wound responses in a regenerative animal-algal holobiont
Source: PubMed Central journal article supplement (PMC11091193; doi:10.1038/s41467-024-48366-2), 2024-05-13
Supplement: 41467_2024_48366_MOESM3_ESM.pdf [file 41467_2024_48366_MOESM3_ESM.pdf]

## **Description of Additional Supplementary Files**

**Supplementary Movie 1.** Live imaging of algal movement around an anterior blastema at 2 dpa. Images are taken every 4 s for 5 min, time stamps in minutes:seconds. Scale bar, 50  $\mu$ m.

**Supplementary Movie 2.** Live imaging of algal movement around a newly regenerated head at 3 dpa. Images are taken every 4 s for 5 min, time stamps in minutes:seconds. Scale bar, 50  $\mu$ m.

**Supplementary Data 1:** Fasta file for the assembled acoel transcriptome.

**Supplementary Data 2:** Fasta file for the assembled algal transcriptome.

**Supplementary Data 3.** Gene annotations for acoel and alga transcriptomes. Species origin and gene names used in this study are provided in separate columns.

**Supplementary Data 4.** Oligo sequences used in this study. Oligo pools for HCR to detect Cl-runt expression, primers for cloning gene fragments used in RNAi (Cl-runt, Cl-egr) and ISH (Cl-egr, Cl-pc2) experiments, and custom oligos for RNA-seq experiments are listed with their sequences.

**Supplementary Data 5:** log<sub>2</sub>FoldChange and normalized counts of genes shown in the figures. Values are based on analysis with DESEQ2. Log<sub>2</sub>FC are only included if the padjusted values are smaller than or equal to 0.05.
